# Supplementary material for: Hsa_circ_0001666 promotes non-small cell lung cancer migration and invasion through miR-1184/miR-548I/AGO1 axis
Source: PubMed Central journal article supplement — Mol Ther Oncolytics. 2022 Feb 15;24:597–611. doi: 10.1016/j.omto.2022.02.011 (PMC8892028; doi:10.1016/j.omto.2022.02.011), 2022-02-15
Supplement: mmc1.pdf [file mmc1.pdf]

OMTO, Volume 24

## Supplemental information

**Hsa\_circ\_0001666 promotes non-small  
cell lung cancer migration and invasion  
through miR-1184/miR-548l/AGO1 axis**

**Xueting Wang, Rui Li, Lingxin Feng, Jing Wang, Qi Qi, Wenjie Wei, and Zhuang Yu**

**Fig.S1**

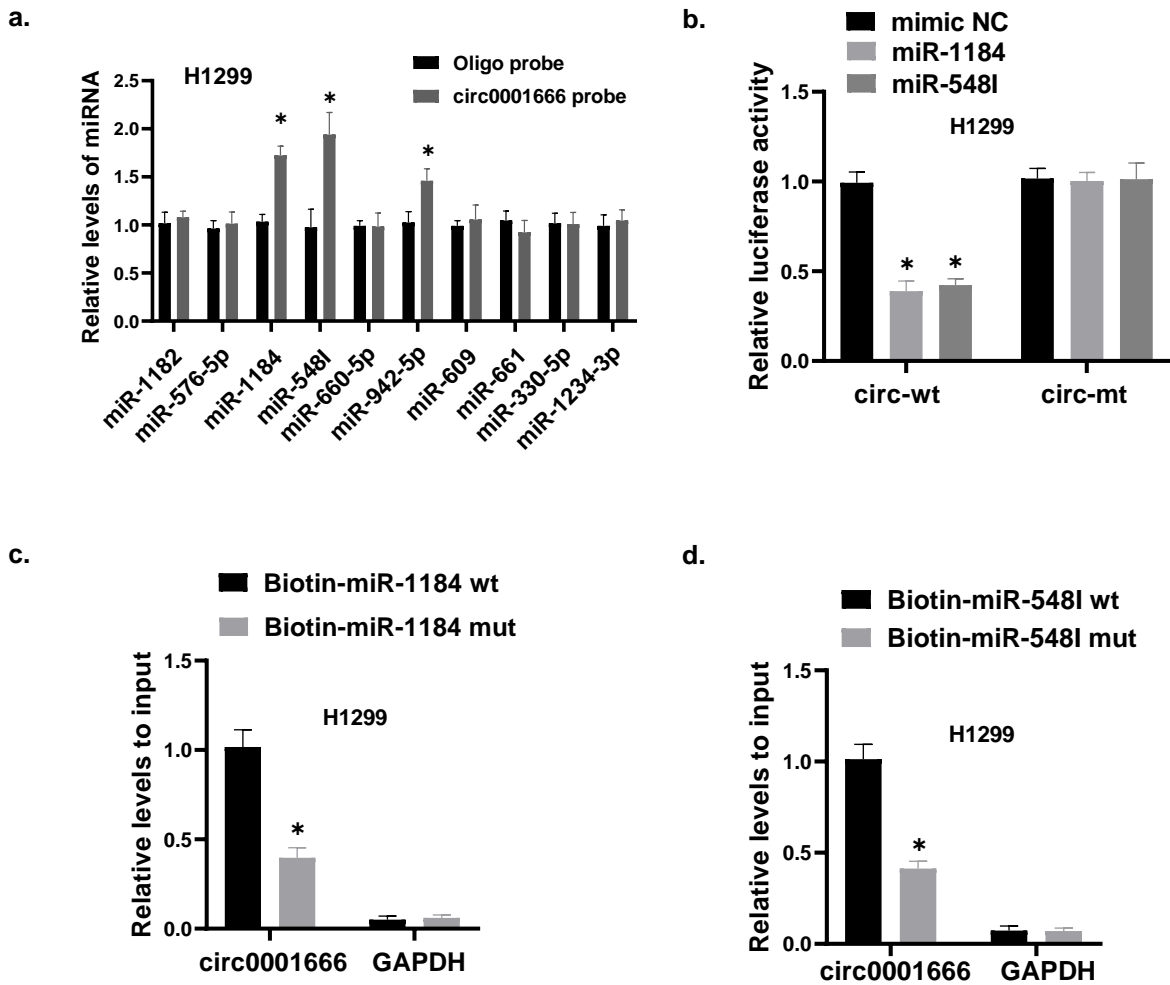

**Fig.S1 Circ0001666 could bind to miR-1184 and miR-548I in H1299 cells.**

**a** The relative levels of 10 candidate miRNAs were pulled down by circ0001666 probe or oligo probe in H1299 cells. **b** The luciferase activity after co-transfection with circ0001666-wt or circ0001666-mut and miR-1184/miR-548I mimics or vector in H1299 cells. **c-d** Relative levels of circ0001666 were captured by biotinylated wild-type miR-1184/miR-548I or mutant miR-1184/miR-548I in H1299 cells.

**Fig.S2**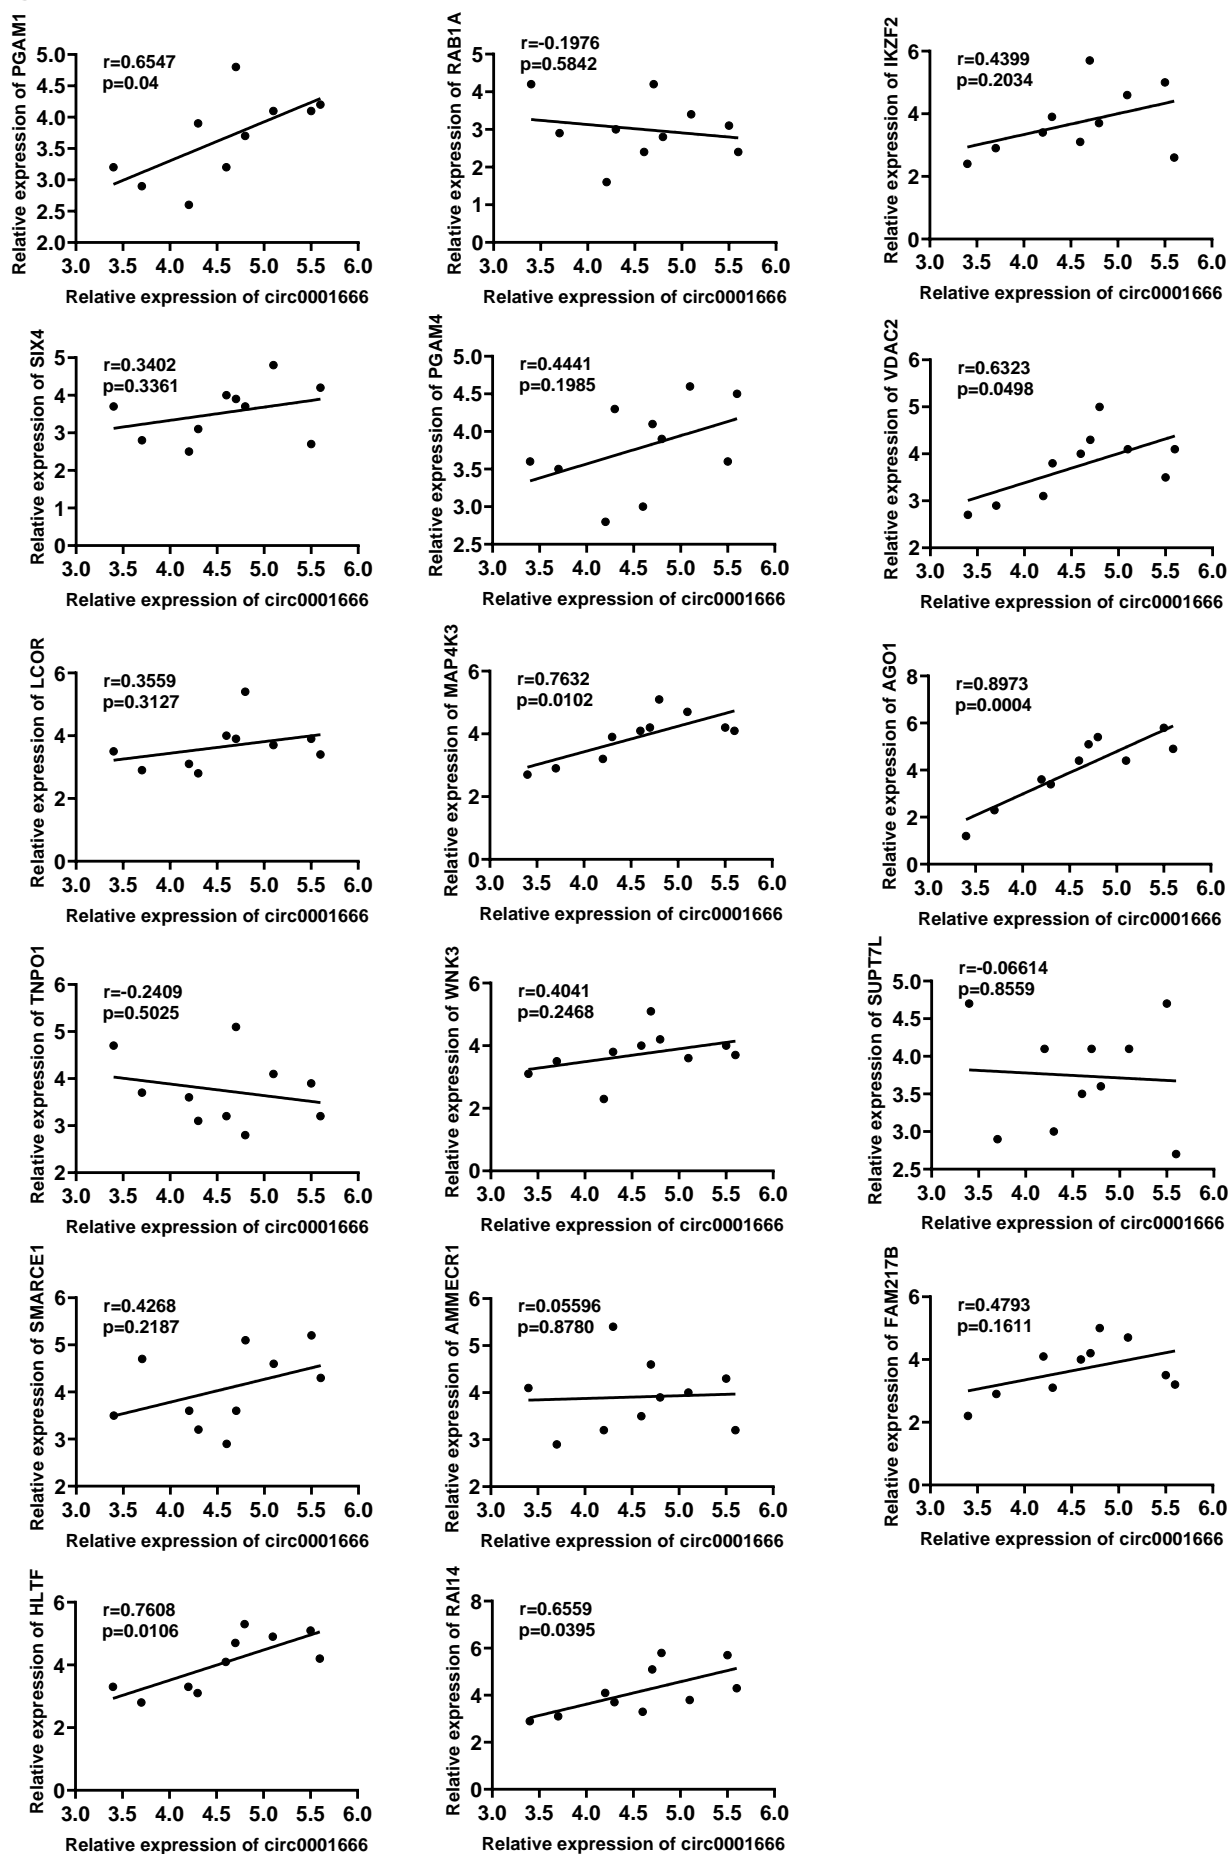

**Fig.S2** The correlation between circ0001666 and 17 candidate targets genes mRNA in our NSCLC samples.

## Supplementary Tables

**Supplementary table 1** The sequences of primers, oligonucleotides and probes used in this study. Primers for PCR (5'-3')

|                          |                          |
|--------------------------|--------------------------|
| Divergent-circ0001666 F  | GCCTAGCTGTCAAGGAGTGGTT   |
| Divergent-circ0001666 R  | GCCACCGCAGATCCAAGATT     |
| Convergent-circ0001666 F | AGCACCACCGAAGCAAGTATCC   |
| Convergent-circ0001666 R | TCTTATCCTGCTCCACCATGCC   |
| linear-FAM120B F         | CATGAGCAGTGGAGAGATTGA    |
| linear-FAM120B R         | GTGCTGGTGACATCTTGACAG    |
| GAPDH F                  | AAATCAAGTGGGCGATGCTG     |
| GAPDH R                  | GCAGGAGGCATTGCTGATGAT    |
| Divergent-GAPDH F        | GAAGGTGAAGGTCGAGTC       |
| Divergent-GAPDH R        | GAAGATGGTGATGGGATTTC     |
| hsa-miR-1182 F           | GGAGGGTCTTGGGAGGGA       |
| hsa-miR-1182 R           | AGTGCAGGGTCCGAGGTATT     |
| hsa-miR-567-5p F         | GCGCGATTCTAATTTCTCCAC    |
| hsa-miR-567-5p R         | AGTGCAGGGTCCGAGGTATT     |
| hsa-miR-1184 F           | CGCCTGCAGCGACTTGATG      |
| hsa-miR-1184 R           | AGTGCAGGGTCCGAGGTATT     |
| hsa-miR-548I F           | GCGAAAAGTATTTGCGGGT      |
| hsa-miR-548I R           | AGTGCAGGGTCCGAGGTATT     |
| hsa-miR-660-5p F         | CGCGTACCCATTGCATATCG     |
| hsa-miR-660-5p R         | AGTGCAGGGTCCGAGGTATT     |
| hsa-miR-942-5p F         | CGCGTCTTCTCTGTTTTGGC     |
| hsa-miR-942-5p R         | AGTGCAGGGTCCGAGGTATT     |
| hsa-miR-609 F            | GCGCGAGGGTGTTCCTCTC      |
| hsa-miR-609 R            | AGTGCAGGGTCCGAGGTATT     |
| hsa-miR-661 F            | TGCCTGGGTCTCTGGCCT       |
| hsa-miR-661 R            | AGTGCAGGGTCCGAGGTATT     |
| hsa-miR-330-5p F         | GCGTCTCTGGGCCTGTGTC      |
| hsa-miR-330-5p R         | AGTGCAGGGTCCGAGGTATT     |
| hsa-miR-1234-3p F        | TCGGCCTGACCACCA          |
| hsa-miR-1234-3p R        | AGTGCAGGGTCCGAGGTATT     |
| PGAM1 F                  | GGCACAGGTATTTGGCCTCA     |
| PGAM1 R                  | CAAACCTCATAGCCAGCATCAGAC |
| RAB1A F                  | TGCCTTCTTCTTAGGTTTGCA    |
| RAB1A R                  | GGCCTGCTGTGTCCCATATTT    |
| IKZF2 F                  | TGTGGACGAAGCTACAAGCA     |
| IKZF2 R                  | CTTCCATAGGAGGTACATGGTGA  |
| SIX4 F                   | TGGCAGCTTCAACAAGGTAAT    |

|                            |                                    |
|----------------------------|------------------------------------|
| SIX4 R                     | GGCCTGTATTAGGAACCGTG               |
| PGAM4 F                    | AAGCCACGACCAATGAGGA                |
| PGAM4 R                    | CACTGGAATGACTAGAGCCC               |
| VDAC2 F                    | TCAGGACACCACCAGATTCC               |
| VDAC2 R                    | TAATGACCTTGCCTCTCACA               |
| LCOR F                     | AGAACTGGATTCGTGGCG                 |
| LCOR R                     | AGGTCCAAACAGCCCTTCA                |
| MAP4K3 F                   | AGTCTTTCATTGGCACACCA               |
| MAP4K3 R                   | ACATAGGAGGCTGAAGCTCTG              |
| AGO1 F                     | GAAACCAATCAAGCTCCTGGC              |
| AGO1 R                     | TATCCACCACTTCCCGGTTG               |
| TNPO1 F                    | GGTGACTCCTCTCCTCTGATT              |
| TNPO1 R                    | CACCAAATGCTCCCTCACAG               |
| WNK3 F                     | GGCATAGTTGCTACAGATCCAC             |
| WNK3 R                     | CCTTTGTCCAGTCATCCACCA              |
| SUPT7L F                   | GTACCTCCTTGTCTCGGTTCA              |
| SUPT7L R                   | TGTGAGATCCTTGCCTTTACC              |
| SMARCE1 F                  | CACCAGGGTTTGTGGGATAACA             |
| SMARCE1 R                  | TGATACCAGAGGATGCCGTGA              |
| AMMECR1 F                  | CAACGAGCCCTATGCCCTTA               |
| AMMECR1 R                  | ACCCACCTCCAGTCCAATA                |
| FAM217B F                  | AGTGCTCTGGCTATTGCTGAA              |
| FAM217B R                  | TCTCCTCACCACCGGAACTTT              |
| HLTF F                     | AGCATAAGGTGGCTAAGAGTGA             |
| HLTF R                     | CTGGATTGGAGTACCTGTCAA              |
| RAI14 F                    | GAGGAAGGAGAGGAAGGTGTTG             |
| RAI14 R                    | AGTAGCCGGTCATCATTCTTGT             |
| <b>FISH probes</b>         |                                    |
| circ0001666 (cy3)          | Ribobio                            |
| U6 (cy3)                   | Ribobio                            |
| 18s (cy3)                  | Ribobio                            |
| miR-1184 mimic (Dig)       | Ribobio                            |
| miR-548I mimic (Dig)       | Ribobio                            |
| <b>Biotinylated probes</b> |                                    |
| circ0001666 probe          | GAACTCCGGGAAAGGATCTGGAATGGTCATCTGC |
| (biotin) miR-1184 mimics   | CCUUCGGUAGUUCAGCGACGUCC            |
| (biotin) miR-1184 mutant   | CCUUCGGUAGUUCAGCCUUUCGC            |
| (biotin) miR-548I mimics   | CUGUUUUGGGCGUUUAUGAAAA             |
| (biotin) miR-548I mutant   | CUGUUUUGGGCGUCACGCUUUC             |
| <b>lentivirus-shRNA</b>    |                                    |
| GV298-NC-shRNA             | BioVector                          |

|                           |                                                      |
|---------------------------|------------------------------------------------------|
| GV298-circ0001666-shRNA#1 | GATGACCATTCCAGATCCTTTCTCGAGAAAGGATCTGG<br>AATGGTCATC |
| GV298-circ0001666-shRNA#2 | AGATGACCATTCCAGATCCTTCTCGAGAAGGATCTGGA<br>ATGGTCATCT |
| GV298-AGO1-shRNA#1        | GGTGAATACATCTCGAGATGTATTCCACCACTTCCC                 |
| GV298-AGO1-shRNA#2        | GCTCCTGGCCAATTACTTTGACTCGAGTCAAAGTAATT<br>GGCCAGGAGC |
